# Supplementary material for: Autophagy is an important action mode for functionalized selenium nanoparticles to exhibit anti-colorectal cancer activity
Source: Royal Society of Chemistry journal article supplement (doi:10.1039/c8bm00670a), 2018-01-01
Supplement: c8bm00670a1.pdf [file c8bm00670a1.pdf]

## Supporting Information

for

### Autophagy is an Important Action Mode for Functionalized Selenium Nanoparticles to Exhibit Anti-colorectal Cancer Activity

Guanning Huang<sup>a†</sup>, Zumei Liu<sup>b†</sup>, Lizhen He<sup>a</sup>, Kar-Him Luk<sup>b</sup>, Siu-To Cheung<sup>b</sup>,  
Ka-Hing Wong<sup>b\*</sup>, Tianfeng Chen<sup>a\*</sup>

#### Results:

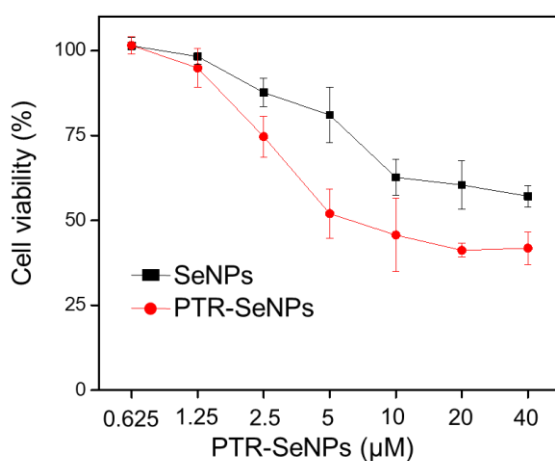

**Figure S1.** Cell viability of HCT 116 cells treated by SeNPs and PTR-SeNPs for 72 h. Each value represents means  $\pm$  SD (n = 3).

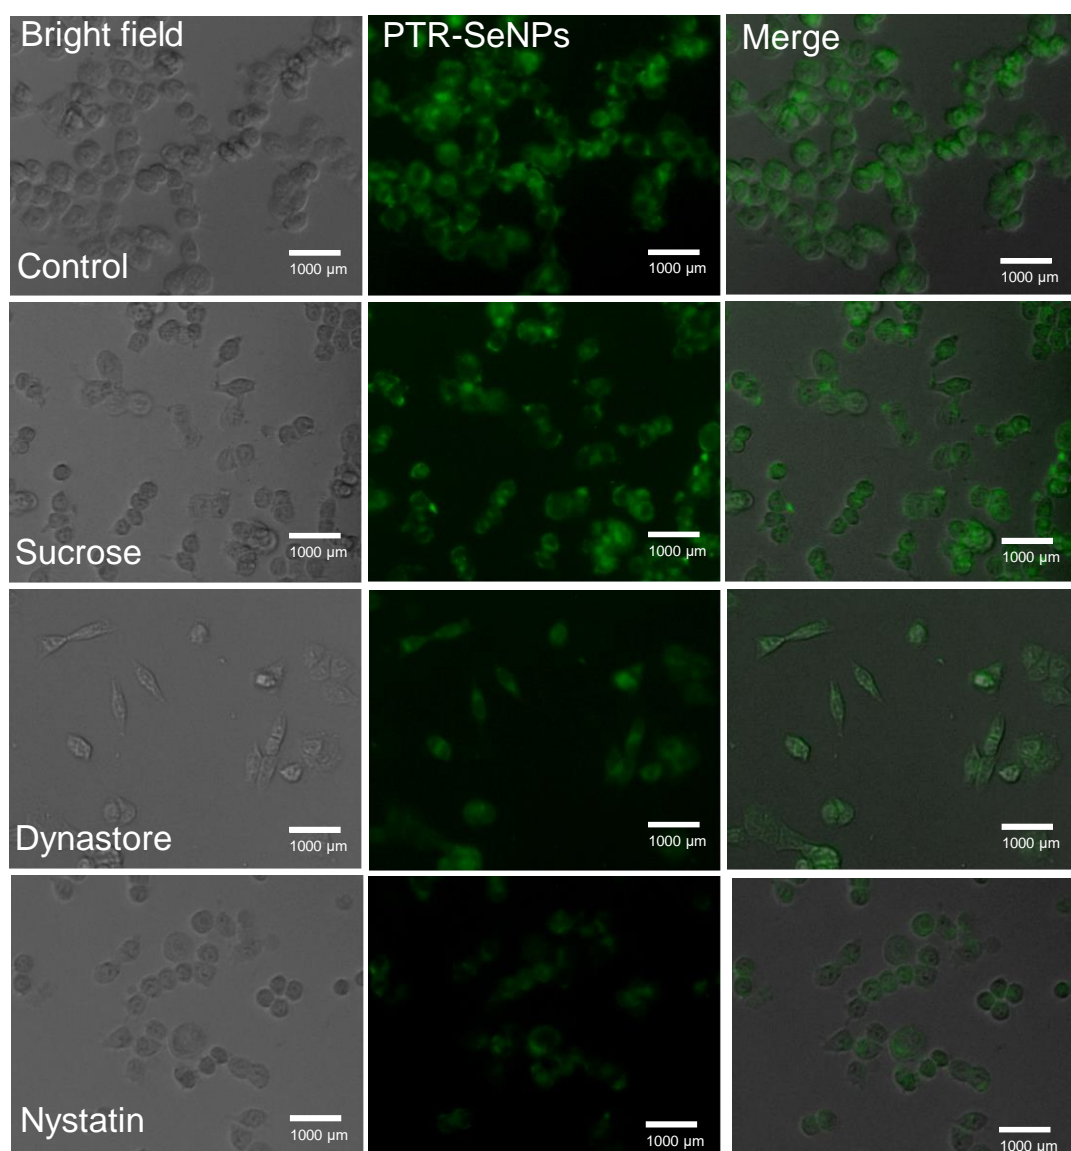

**Figure S2.** Effects of endocytosis inhibitors on the cellular uptake. Cellular uptake of C6-PTR-SeNPs (green) in HCT 116 cells were examined by fluorescence microscope after pre-treated with sucrose, dynastore and nystatin for 1 h before adding 10  $\mu$ M of C6-PTR-SeNPs and incubated at 37  $^{\circ}$ C for 2 h.

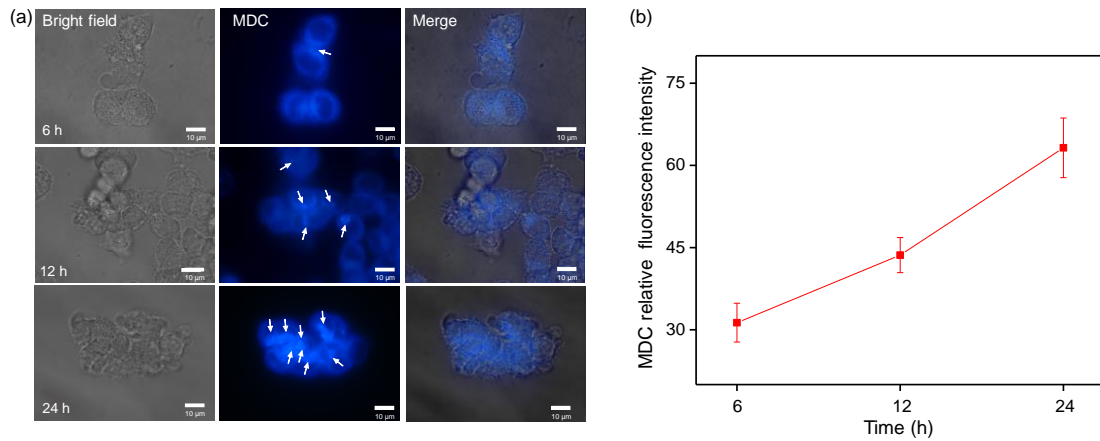

**Figure S3.** Autophagic flux measurements of PTR-SeNPs in HCT 116 cells. (a) PTR-SeNPs (10 µM) induced autophagy in HCT 116 cells at 6, 12 and 24 h by MDC staining. Autophagosome punta (arrows) were seen in the cytosol; (b) Blue (MDC) dots in cells were counted using the Image J ( $n \pm 3$ , means  $\pm$  S.D.).

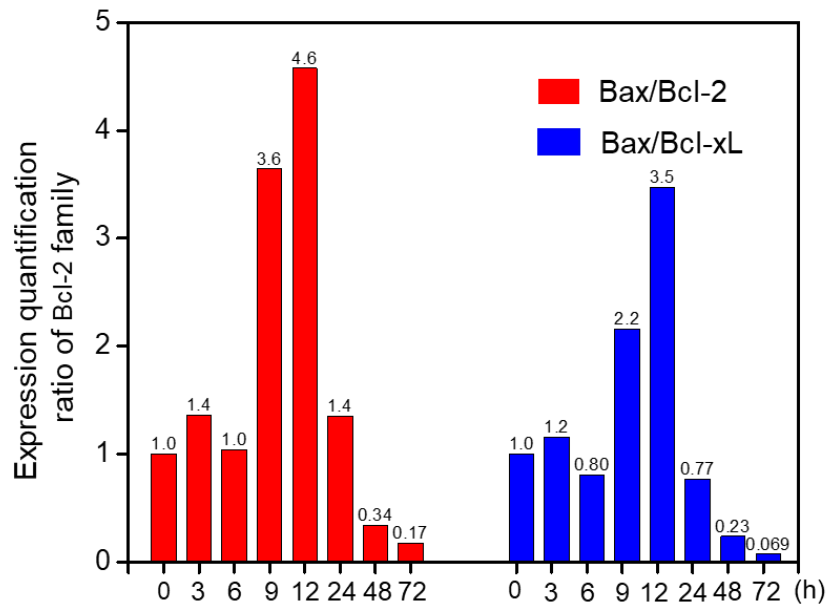

**Figure S4.** Western blot analysis of protein expression ratio of Bax/Bcl-2 and Bax/Bcl-xL after 72-h treatment.
